# Supplementary material
Source: PubMed Central journal article supplement (PMC6039255)
Supplement: NIHMS965649-supplement-1.pdf [file NIHMS965649-supplement-1.pdf]

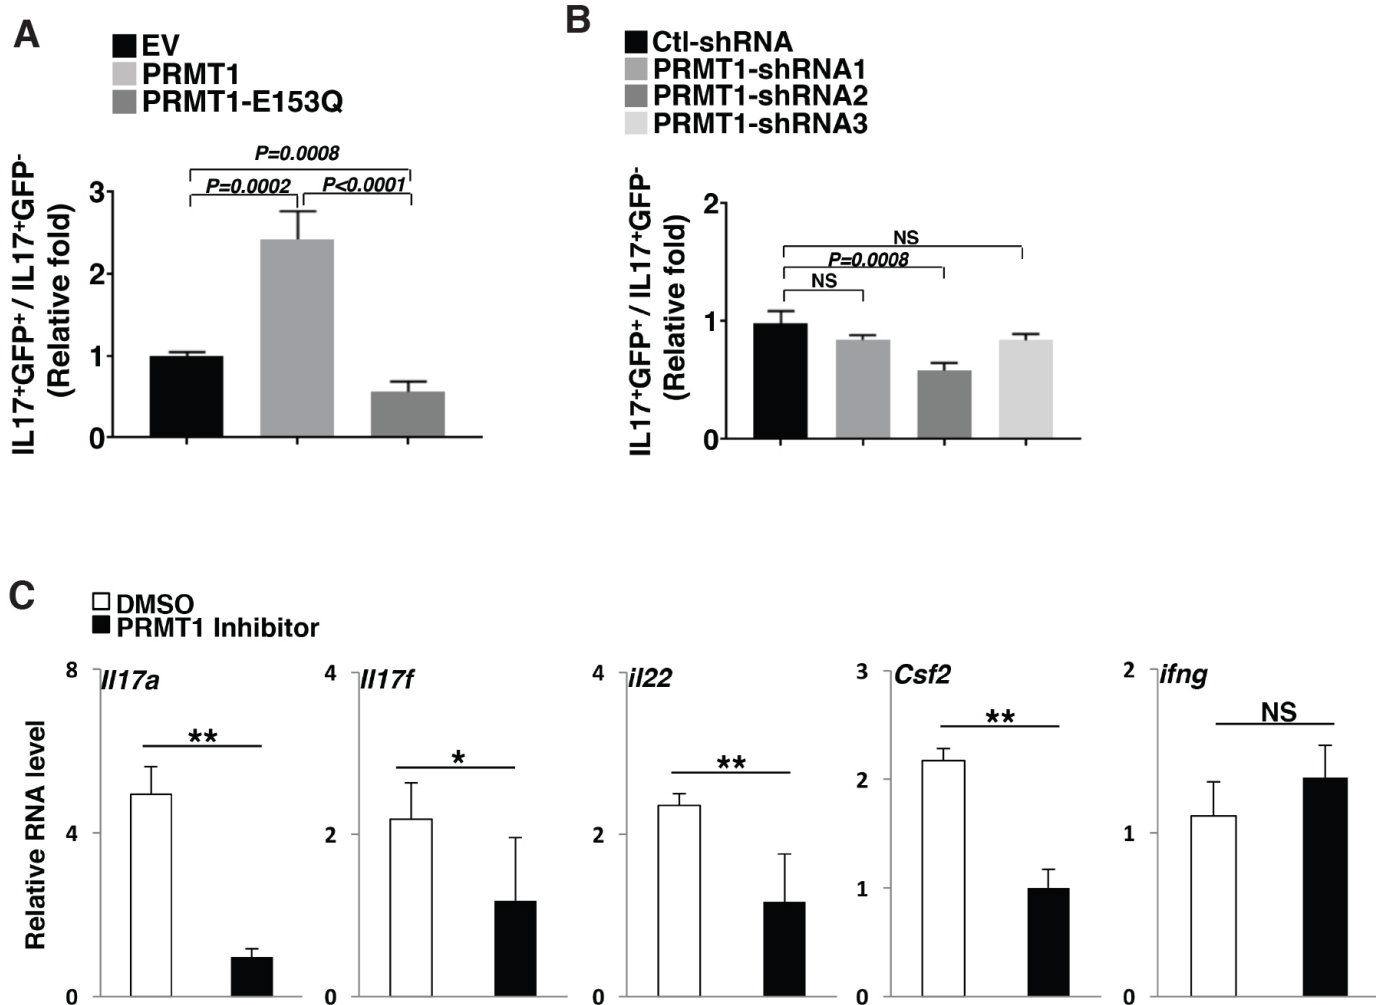

Supplementary Figure 1. **A**) Same as figure 1D, but represent the data as fold of increase IL-17+GFP+/IL-17+GFP-. **B**) Same as figure 1H, but represent the data as fold of increase 17+GFP+/IL-17+GFP-. **C**) PRMT1 inhibitor inhibits the expression of indicated Th17 genes critical for induction of EAE in CD4+ T cells isolated from MOG<sub>35-55</sub> primed mice and stimulated *in vitro* by IL-23, MOG<sub>35-55</sub> and with or without PRMT1 inhibitor (**A**, **B**, **C**, two-tailed unpaired t-test).

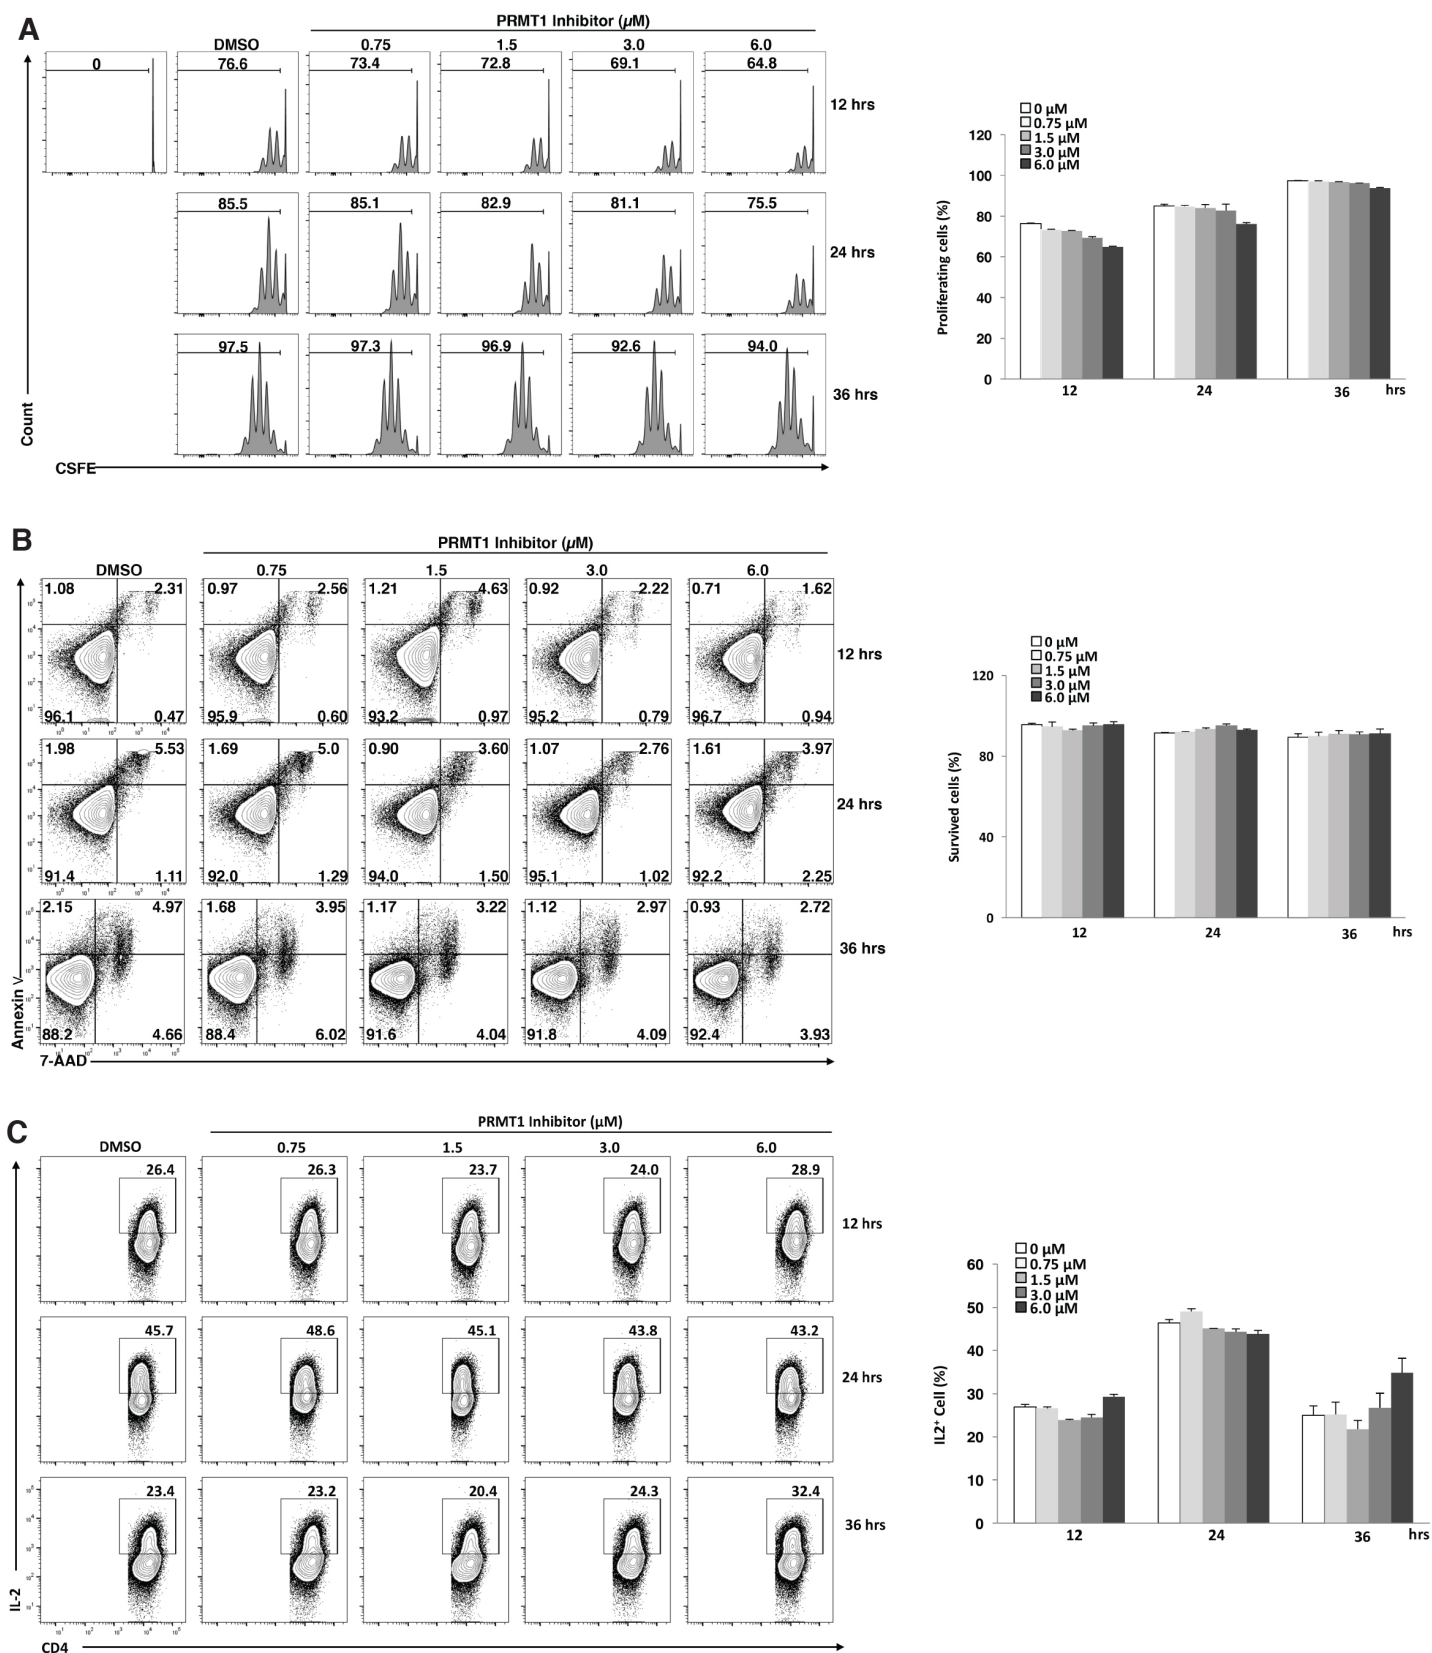

Supplementary Figure 2. PRM1 inhibitor does not affect T cell proliferation, viability and IL-12 production during Th17 differentiation. Flow cytometric analysis of percentage of CSFE positive cells (A), viable cells with AnnexinV and 7-AAD (B), and IL-2+ cells (C) among naïve CD4+ T cells differentiated under Th17 priming conditions in the presence and absence (DMSO) of indicated concentrations of PRMT1. Left panels are the quantification results of the right panels.
